# Supplementary material for: Systemic Immune-Inflammation Index Predicted Short-Term Outcomes in Patients Undergoing Isolated Tricuspid Valve Surgery
Source: MDPI journal article supplement (doi:10.3390/jcm10184147), 2021-09-14
Supplement: s1 [file s1]

**Supplementary Table S1.** Predictors associated with composite 30-day major postoperative complications in patients undergoing isolated tricuspid valve surgery.

| Variables                                            | Univariate            | Multivariable  |                                      |
|------------------------------------------------------|-----------------------|----------------|--------------------------------------|
|                                                      | Hazard Ratio (95% CI) | <i>P</i> value | Hazard Ratio (95% CI) <i>P</i> value |
| <b>SII (<math>\geq 1423.12 \times 10^9/L</math>)</b> | 4.96 (2.73–9.01)      | <b>0.000</b>   | 2.63 (1.18–5.84) <b>0.018</b>        |
| Sex (female)                                         | 1.06 (0.67–1.66)      | 0.809          |                                      |
| Age, yr                                              | 1.03 (1.01–1.05)      | <b>0.003</b>   |                                      |
| Body mass index, kg/m <sup>2</sup>                   | 0.96 (0.90–1.04)      | 0.328          |                                      |
| Diabetes                                             | 1.71 (1.01–2.88)      | <b>0.046</b>   |                                      |
| Hypertension                                         | 1.63 (1.05–2.54)      | <b>0.029</b>   |                                      |
| NYHA                                                 | 1.73 (1.12–2.67)      | <b>0.014</b>   |                                      |
| EuroSCORE                                            | 1.06 (1.03–1.10)      | <b>0.001</b>   |                                      |
| Preoperative hematocrit, %                           | 0.93 (0.88–0.96)      | <b>0.001</b>   |                                      |
| Total bilirubin, mg/dl                               | 1.06 (0.70–1.60)      | 0.790          |                                      |
| Serum albumin, g/dL                                  | 0.43 (0.29–0.62)      | <b>0.001</b>   |                                      |
| Creatinine, mg/dL                                    | 0.96 (0.76–1.21)      | 0.718          |                                      |
| AST, IU/L                                            | 1.00 (0.98–1.03)      | 0.920          |                                      |
| ALT, IU/L                                            | 0.98 (0.96–1.01)      | 0.152          |                                      |
| ALP, IU/L                                            | 1.01 (1.00–1.01)      | <b>0.020</b>   |                                      |
| Uric acid, mg/dL                                     | 1.09 (0.98–1.20)      | 0.095          |                                      |
| BNP, pg/mL                                           | 1.00 (1.00–1.01)      | 0.780          |                                      |
| CRP                                                  | 1.39 (1.18–1.64)      | <b>0.001</b>   |                                      |
| PLR                                                  | 1.04 (1.03–1.06)      | <b>0.001</b>   |                                      |
| NLR                                                  | 1.33 (1.24–1.42)      | <b>0.001</b>   |                                      |
| LVEF, %                                              | 0.98 (0.98–1.01)      | 0.106          |                                      |

|                         |                  |              |
|-------------------------|------------------|--------------|
| RV dysfunction          | 1.74 (1.10–2.73) | <b>0.017</b> |
| PASP, mmHg              | 0.99 (0.98–1.01) | 0.293        |
| Use of ACEI/ARB         | 1.82 (1.17–2.81) | <b>0.007</b> |
| Use of $\beta$ -blocker | 1.74 (1.11–2.71) | <b>0.015</b> |
| Use of CCB              | 2.03 (1.30–3.17) | <b>0.002</b> |
| Use of Digoxin          | 1.34 (0.85–2.12) | 0.210        |
| Use of Diuretics        | 1.34 (1.85–2.16) | 0.210        |

**Supplementary Table S2.** Predictors associated with composite 30-day major postoperative complications in patients undergoing isolated tricuspid valve surgery.

| Variables                                           | Univariate            |                | Multivariable         |                |
|-----------------------------------------------------|-----------------------|----------------|-----------------------|----------------|
|                                                     | Hazard Ratio (95% CI) | <i>P</i> value | Hazard Ratio (95% CI) | <i>P</i> value |
| <b>SII (<math>\geq 878.06 \times 10^9/L</math>)</b> | 4.91 (2.95–8.16)      | <b>0.000</b>   | 2.19 (1.05–4.54)      | <b>0.036</b>   |
| Sex (female)                                        | 1.06 (0.67–1.66)      | 0.809          |                       |                |
| Age, yr                                             | 1.03 (1.01–1.05)      | <b>0.003</b>   |                       |                |
| Body mass index, kg/m <sup>2</sup>                  | 0.96 (0.90–1.04)      | 0.328          |                       |                |
| Diabetes                                            | 1.71 (1.01–2.88)      | <b>0.046</b>   |                       |                |
| Hypertension                                        | 1.63 (1.05–2.54)      | <b>0.029</b>   |                       |                |
| NYHA                                                | 1.73 (1.12–2.67)      | <b>0.014</b>   |                       |                |
| EuroSCORE                                           | 1.06 (1.03–1.10)      | <b>0.001</b>   |                       |                |
| Preoperative hematocrit, %                          | 0.93 (0.88–0.96)      | <b>0.001</b>   |                       |                |
| Total bilirubin, mg/dl                              | 1.06 (0.70–1.60)      | 0.790          |                       |                |
| Serum albumin, g/dL                                 | 0.43 (0.29–0.62)      | <b>0.001</b>   |                       |                |
| Creatinine, mg/dL                                   | 0.96 (0.76–1.21)      | 0.718          |                       |                |
| AST, IU/L                                           | 1.00 (0.98–1.03)      | 0.920          |                       |                |

|                         |                  |              |
|-------------------------|------------------|--------------|
| ALT, IU/L               | 0.98 (0.96–1.01) | 0.152        |
| ALP, IU/L               | 1.01 (1.00–1.01) | <b>0.020</b> |
| Uric acid, mg/dL        | 1.09 (0.98–1.20) | 0.095        |
| BNP, pg/mL              | 1.00 (1.00–1.01) | 0.780        |
| CRP                     | 1.39 (1.18–1.64) | <b>0.001</b> |
| PLR                     | 1.04 (1.03–1.06) | <b>0.001</b> |
| NLR                     | 1.33 (1.24–1.42) | <b>0.001</b> |
| LVEF, %                 | 0.98 (0.98–1.01) | 0.106        |
| RV dysfunction          | 1.74 (1.10–2.73) | <b>0.017</b> |
| PASP, mmHg              | 0.99 (0.98–1.01) | 0.293        |
| Use of ACEI/ARB         | 1.82 (1.17–2.81) | <b>0.007</b> |
| Use of $\beta$ -blocker | 1.74 (1.11–2.71) | <b>0.015</b> |
| Use of CCB              | 2.03 (1.30–3.17) | <b>0.002</b> |
| Use of Digoxin          | 1.34 (0.85–2.12) | 0.210        |
| Use of Diuretics        | 1.34 (1.85–2.16) | 0.210        |

**Supplementary Table S3.** Predictors associated with composite 30-day major postoperative complications in patients undergoing isolated tricuspid valve surgery.

| Variables                                        | Univariate            |                | Multivariable         |                |
|--------------------------------------------------|-----------------------|----------------|-----------------------|----------------|
|                                                  | Hazard Ratio (95% CI) | <i>P</i> value | Hazard Ratio (95% CI) | <i>P</i> value |
| <b>SII (<math>\geq 750 \times 10^9/L</math>)</b> | 5.34 (3.37–8.47)      | <b>0.000</b>   | 2.81 (1.37–5.76)      | <b>0.005</b>   |
| Sex (female)                                     | 1.06 (0.67–1.66)      | 0.809          |                       |                |
| Age, yr                                          | 1.03 (1.01–1.05)      | <b>0.003</b>   |                       |                |
| Body mass index, kg/m <sup>2</sup>               | 0.97 (0.90–1.04)      | 0.328          |                       |                |
| Diabetes                                         | 1.71 (1.01–2.88)      | <b>0.046</b>   |                       |                |

|                            |                  |              |
|----------------------------|------------------|--------------|
| Hypertension               | 1.63 (1.05–2.54) | <b>0.029</b> |
| NYHA                       | 1.73 (1.12–2.67) | <b>0.014</b> |
| EuroSCORE                  | 1.06 (1.03–1.10) | <b>0.001</b> |
| Preoperative hematocrit, % | 0.93 (0.90–0.96) | <b>0.001</b> |
| Total bilirubin, mg/dl     | 1.17 (0.83–1.66) | 0.365        |
| Serum albumin, g/dL        | 0.52 (0.37–0.74) | <b>0.001</b> |
| Creatinine, mg/dL          | 0.96 (0.80–1.17) | 0.737        |
| AST, IU/L                  | 1.00 (0.98–1.03) | 0.920        |
| ALT, IU/L                  | 0.98 (0.96–1.01) | 0.152        |
| ALP, IU/L                  | 1.05 (1.00–1.01) | <b>0.020</b> |
| Uric acid, mg/dL           | 1.09 (0.99–1.20) | 0.095        |
| BNP, pg/mL                 | 1.00 (1.00–1.01) | 0.200        |
| CRP                        | 1.39 (1.18–1.64) | <b>0.001</b> |
| PLR                        | 1.04 (1.03–1.06) | <b>0.001</b> |
| NLR                        | 1.33 (1.24–1.42) | <b>0.001</b> |
| LVEF, %                    | 0.98 (0.95–1.01) | 0.106        |
| RV dysfunction             | 1.74 (1.10–2.73) | <b>0.017</b> |
| PASP, mmHg                 | 0.99 (0.98–1.01) | 0.293        |
| Use of ACEI/ARB            | 1.82 (1.17–2.81) | <b>0.007</b> |
| Use of $\beta$ -blocker    | 1.74 (1.11–2.71) | <b>0.015</b> |
| Use of CCB                 | 2.03 (1.30–3.17) | <b>0.002</b> |
| Use of Digoxin             | 1.34 (0.85–2.12) | 0.210        |
| Use of Diuretics           | 1.34 (1.85–2.16) | 0.210        |

---

**Supplementary Table S4.** Predictors associated with composite 30-day major postoperative complications in patients undergoing isolated tricuspid valve surgery.

| Variables                                           | Univariate            | Multivariable  |                                      |
|-----------------------------------------------------|-----------------------|----------------|--------------------------------------|
|                                                     | Hazard Ratio (95% CI) | <i>P</i> value | Hazard Ratio (95% CI) <i>P</i> value |
| <b>SII (<math>\geq 694.03 \times 10^9/L</math>)</b> | 5.63 (3.60–8.80)      | <b>0.000</b>   | 3.97 (1.72–9.19) <b>0.001</b>        |
| Sex (female)                                        | 1.06 (0.67–1.66)      | 0.809          |                                      |
| Age, yr                                             | 1.03 (1.01–1.05)      | <b>0.003</b>   |                                      |
| Body mass index, kg/m <sup>2</sup>                  | 0.97 (0.90–1.04)      | 0.328          |                                      |
| Diabetes                                            | 1.71 (1.01–2.88)      | <b>0.046</b>   |                                      |
| Hypertension                                        | 1.63 (1.05–2.54)      | <b>0.029</b>   |                                      |
| NYHA                                                | 1.73 (1.12–2.67)      | <b>0.014</b>   |                                      |
| EuroSCORE                                           | 1.06 (1.03–1.10)      | <b>0.001</b>   |                                      |
| Preoperative hematocrit, %                          | 0.93 (0.90–0.96)      | <b>0.001</b>   |                                      |
| Total bilirubin, mg/dl                              | 1.17 (0.83–1.66)      | 0.365          |                                      |
| Serum albumin, g/dL                                 | 0.52 (0.37–0.74)      | <b>0.001</b>   |                                      |
| Creatinine, mg/dL                                   | 0.96 (0.80–1.17)      | 0.737          |                                      |
| AST, IU/L                                           | 1.00 (0.98–1.03)      | 0.920          |                                      |
| ALT, IU/L                                           | 0.98 (0.96–1.01)      | 0.152          |                                      |
| ALP, IU/L                                           | 1.05 (1.00–1.01)      | <b>0.020</b>   |                                      |
| Uric acid, mg/dL                                    | 1.09 (0.99–1.20)      | 0.095          |                                      |
| BNP, pg/mL                                          | 1.00 (1.00–1.01)      | 0.200          |                                      |
| CRP                                                 | 1.39 (1.18–1.64)      | <b>0.001</b>   |                                      |
| PLR                                                 | 1.04 (1.03–1.06)      | <b>0.001</b>   |                                      |
| NLR                                                 | 1.33 (1.24–1.42)      | <b>0.001</b>   |                                      |
| LVEF, %                                             | 0.98 (0.95–1.01)      | 0.106          |                                      |

|                         |                  |              |
|-------------------------|------------------|--------------|
| RV dysfunction          | 1.74 (1.10–2.73) | <b>0.017</b> |
| PASP, mmHg              | 0.99 (0.98–1.01) | 0.293        |
| Use of ACEI/ARB         | 1.82 (1.17–2.81) | <b>0.007</b> |
| Use of $\beta$ -blocker | 1.74 (1.11–2.71) | <b>0.015</b> |
| Use of CCB              | 2.03 (1.30–3.17) | <b>0.002</b> |
| Use of Digoxin          | 1.34 (0.85–2.12) | 0.210        |
| Use of Diuretics        | 1.34 (1.85–2.16) | 0.210        |

**Supplementary Table S5.** Predictors associated with composite 30-day major postoperative complications in patients undergoing isolated tricuspid valve surgery.

| Variables                                        | Univariate            |                | Multivariable         |                |
|--------------------------------------------------|-----------------------|----------------|-----------------------|----------------|
|                                                  | Hazard Ratio (95% CI) | <i>P</i> value | Hazard Ratio (95% CI) | <i>P</i> value |
| <b>SII (<math>\geq 551 \times 10^9/L</math>)</b> | 4.28 (2.76–6.62)      | <b>0.000</b>   | 2.12 (1.11–4.08)      | <b>0.024</b>   |
| Sex (female)                                     | 1.06 (0.67–1.66)      | 0.809          |                       |                |
| Age, yr                                          | 1.03 (1.01–1.05)      | <b>0.003</b>   |                       |                |
| Body mass index, kg/m <sup>2</sup>               | 0.96 (0.90–1.04)      | 0.328          |                       |                |
| Diabetes                                         | 1.71 (1.01–2.88)      | <b>0.046</b>   |                       |                |
| Hypertension                                     | 1.63 (1.05–2.54)      | <b>0.029</b>   |                       |                |
| NYHA                                             | 1.73 (1.12–2.67)      | <b>0.014</b>   |                       |                |
| EuroSCORE                                        | 1.06 (1.03–1.10)      | <b>0.001</b>   |                       |                |
| Preoperative hematocrit, %                       | 0.93 (0.88–0.96)      | <b>0.001</b>   |                       |                |
| Total bilirubin, mg/dl                           | 1.06 (0.70–1.60)      | 0.790          |                       |                |
| Serum albumin, g/dL                              | 0.43 (0.29–0.62)      | <b>0.001</b>   |                       |                |
| Creatinine, mg/dL                                | 0.96 (0.76–1.21)      | 0.718          |                       |                |
| AST, IU/L                                        | 1.00 (0.98–1.03)      | 0.920          |                       |                |

|                         |                  |              |
|-------------------------|------------------|--------------|
| ALT, IU/L               | 0.98 (0.96–1.01) | 0.152        |
| ALP, IU/L               | 1.01 (1.00–1.01) | <b>0.020</b> |
| Uric acid, mg/dL        | 1.09 (0.98–1.20) | 0.095        |
| BNP, pg/mL              | 1.00 (1.00–1.01) | 0.780        |
| CRP                     | 1.39 (1.18–1.64) | <b>0.001</b> |
| PLR                     | 1.04 (1.03–1.06) | <b>0.001</b> |
| NLR                     | 1.33 (1.24–1.42) | <b>0.001</b> |
| LVEF, %                 | 0.98 (0.98–1.01) | 0.106        |
| RV dysfunction          | 1.74 (1.10–2.73) | <b>0.017</b> |
| PASP, mmHg              | 0.99 (0.98–1.01) | 0.293        |
| Use of ACEI/ARB         | 1.82 (1.17–2.81) | <b>0.007</b> |
| Use of $\beta$ -blocker | 1.74 (1.11–2.71) | <b>0.015</b> |
| Use of CCB              | 2.03 (1.30–3.17) | <b>0.002</b> |
| Use of Digoxin          | 1.34 (0.85–2.12) | 0.210        |
| Use of Diuretics        | 1.34 (1.85–2.16) | 0.210        |

**Supplementary Table S6.** Predictors associated with composite 30-day major postoperative complications in patients undergoing isolated tricuspid valve surgery.

| Variables                                                   | Univariate            |                | Multivariable         |                |
|-------------------------------------------------------------|-----------------------|----------------|-----------------------|----------------|
|                                                             | Hazard Ratio (95% CI) | <i>P</i> value | Hazard Ratio (95% CI) | <i>P</i> value |
| <b>SII (<math>\geq 326.26 \times 10^9/L</math>, median)</b> | 2.54 (1.58–4.09)      | <b>0.000</b>   | 2.13 (1.17–3.89)      | <b>0.014</b>   |
| Sex (female)                                                | 1.06 (0.67–1.66)      | 0.809          |                       |                |
| Age, yr                                                     | 1.03 (1.01–1.05)      | <b>0.003</b>   |                       |                |
| Body mass index, kg/m <sup>2</sup>                          | 0.96 (0.90–1.04)      | 0.328          |                       |                |
| Diabetes                                                    | 1.71 (1.01–2.88)      | <b>0.046</b>   |                       |                |

|                            |                  |              |
|----------------------------|------------------|--------------|
| Hypertension               | 1.63 (1.05–2.54) | <b>0.029</b> |
| NYHA                       | 1.73 (1.12–2.67) | <b>0.014</b> |
| EuroSCORE                  | 1.06 (1.03–1.10) | <b>0.001</b> |
| Preoperative hematocrit, % | 0.93 (0.88–0.96) | <b>0.001</b> |
| Total bilirubin, mg/dl     | 1.06 (0.70–1.60) | 0.790        |
| Serum albumin, g/dL        | 0.43 (0.29–0.62) | <b>0.001</b> |
| Creatinine, mg/dL          | 0.96 (0.76–1.21) | 0.718        |
| AST, IU/L                  | 1.00 (0.98–1.03) | 0.920        |
| ALT, IU/L                  | 0.98 (0.96–1.01) | 0.152        |
| ALP, IU/L                  | 1.01 (1.00–1.01) | <b>0.020</b> |
| Uric acid, mg/dL           | 1.09 (0.98–1.20) | 0.095        |
| BNP, pg/mL                 | 1.00 (1.00–1.01) | 0.780        |
| CRP                        | 1.39 (1.18–1.64) | <b>0.001</b> |
| PLR                        | 1.04 (1.03–1.06) | <b>0.001</b> |
| NLR                        | 1.33 (1.24–1.42) | <b>0.001</b> |
| LVEF, %                    | 0.98 (0.98–1.01) | 0.106        |
| RV dysfunction             | 1.74 (1.10–2.73) | <b>0.017</b> |
| PASP, mmHg                 | 0.99 (0.98–1.01) | 0.293        |
| Use of ACEI/ARB            | 1.82 (1.17–2.81) | <b>0.007</b> |
| Use of $\beta$ -blocker    | 1.74 (1.11–2.71) | <b>0.015</b> |
| Use of CCB                 | 2.03 (1.30–3.17) | <b>0.002</b> |
| Use of Digoxin             | 1.34 (0.85–2.12) | 0.210        |
| Use of Diuretics           | 1.34 (1.85–2.16) | 0.210        |

---
